# Supplementary material
Source: ML conference proceedings conference paper supplement (https://proceedings.neurips.cc/paper_files/paper/2022/hash/844f722dbbcb27933ff5baf58a1f00c8-Abstract.html)
Supplement: Supplementary file 1 [file 844f722dbbcb27933ff5baf58a1f00c8-Supplemental-Datasets_and_Benchmarks.zip]

Archive with 2 entries (2 files):
- Supplementary/Mofijul_NeurIPS_Dataset_Track_2022__Camera_ready [Datasheets].pdf
- Supplementary/Mofijul_NeurIPS_Dataset_Track_2022_Camera_ready [Supplementary].pdf
